# Supplementary material for: Autophagy inhibition enhances therapy-induced apoptosis in a Myc-induced model of lymphoma
Source: JCI journal article supplement (doi:10.1172/jci28833), 2007-01-18
Supplement: sd1 [file 1]

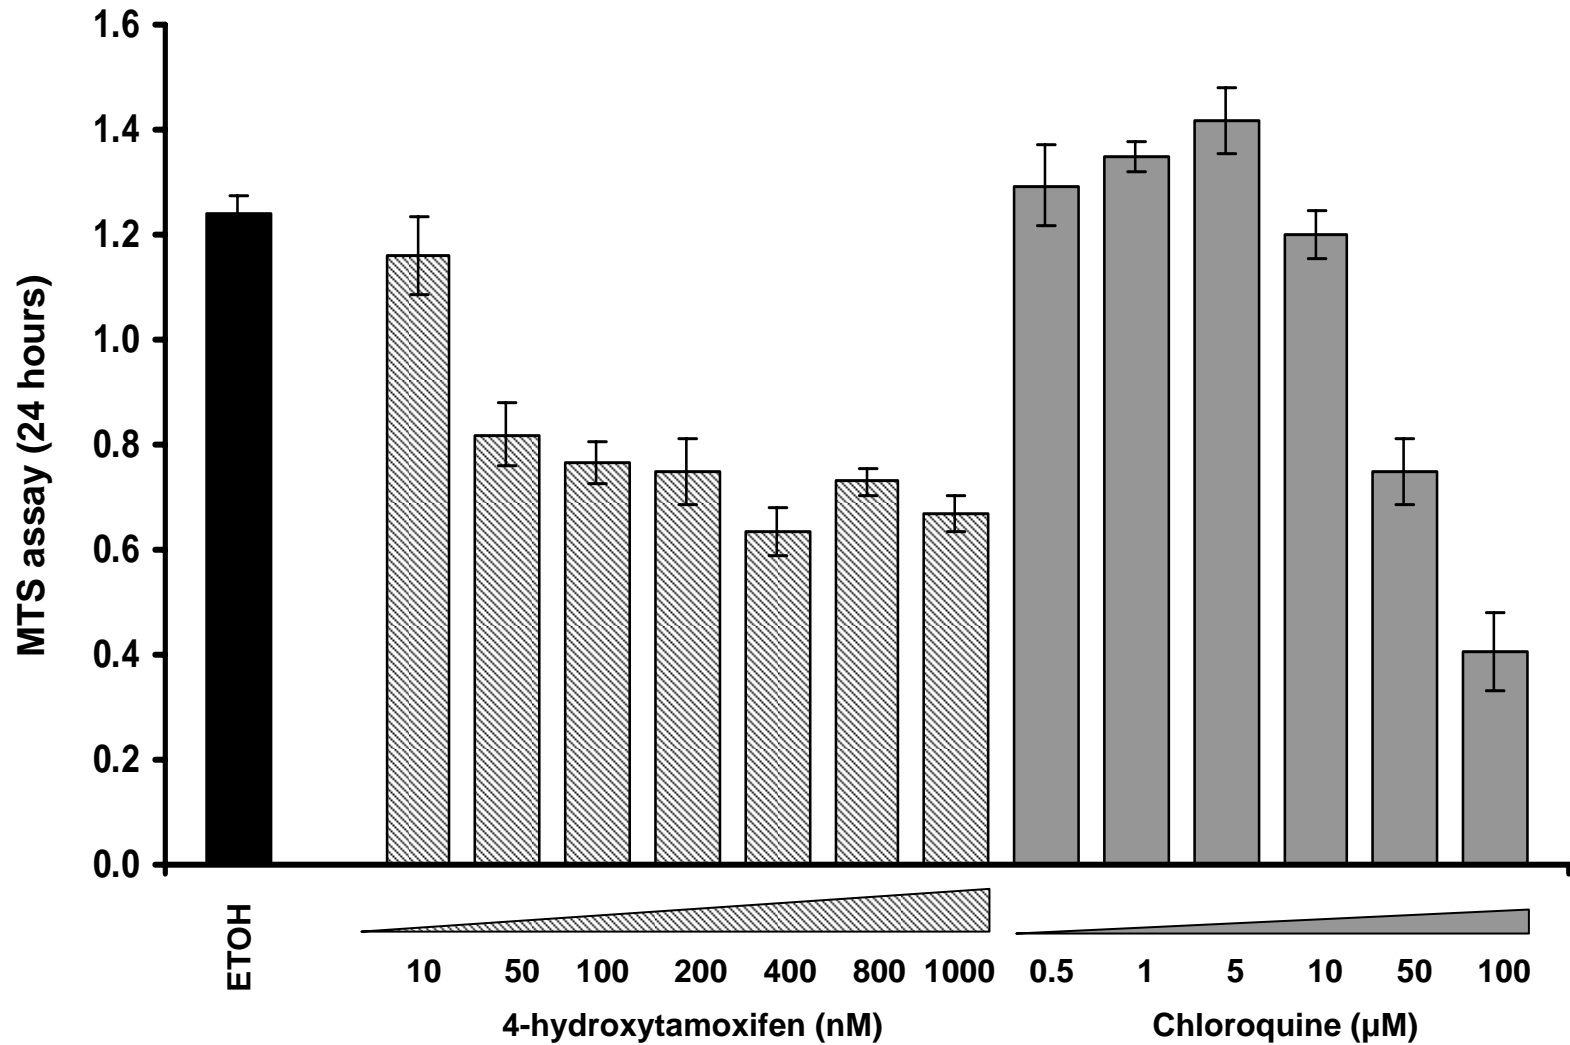

**Supplemental Figure 1. Dose-response relationship of hTAM or CQ and viability of *Myc/p53ER<sup>TAM</sup>* lymphoma cells.** *Myc/p53ER<sup>TAM</sup>* cells were treated with increasing doses of hTAM or CQ and tumor cell proliferation and survival was analyzed by MTS assay at 24 hours. Reported values are mean  $\pm$  S.D of triplicate samples of a representative experiment.
